# Supplementary material for: Hand Hygiene During Facility-Based Childbirth in Cambodia: A Theory-Driven, Mixed-Methods Observational Study
Source: Research Square preprint supplement (doi:10.21203/rs.3.rs-233937/v1), 2021-02-24
Supplement: Supplementary file 1 [file 47e14dc799d6065cc449c1b5.docx]

HAND HYGIENE DURING FACILITY-BASED CHILDBIRTH IN CAMBODIA: A THEORY-DRIVEN, MIXED-METHODS OBSERVATIONAL STUDY

Yolisa Nalule1, *, Helen Buxton2, Por Ir3, Supheap Leang3, Alison Macintyre4, Ponnary Pors5, Channa Samol5, Robert Dreibelbis1

1 Disease Control Department, London School of Hygiene and Tropical Medicine, London WC1E 7HT, UK; [Yolisa.Nalule@lshtm.ac.uk](mailto:Yolisa.Nalule@lshtm.ac.uk) (YN); [Robert.Dreibelbis@lshtm.ac.k](mailto:Robert.Dreibelbis@lshtm.ac.k) (RD)

2 Division of Psychiatry, University College London, London, London W1T 7BN [helen.buxton.20@ucl.ac.uk](mailto:helen.buxton.20@ucl.ac.uk) (HB)

3 National Institute of Public Health, Phnom Penh, Cambodia; [ipor@niph.org.kh](mailto:ipor@niph.org.kh) (PI), [leangsupheap@yahoo.com](mailto:leangsupheap@yahoo.com) (SL)

4 WaterAid Australia, Melbourne, Australia; [alison.macintyre@wateraid.org.au](mailto:alison.macintyre@wateraid.org.au) (AM)

5 WaterAid Cambodia, Phnom Penh, Cambodia; [porsponnary@gmail.com](mailto:porsponnary@gmail.com) (PP), [samolchanna@yahoo.com](mailto:samolchanna@yahoo.com) (CS)

*  Correspondence: [Yolisa.Nalule@lshtm.ac.uk](mailto:Yolisa.Nalule@lshtm.ac.uk)

**Additional File 2: Detailed description of data collection tools used for formative research**

### Semi-structured Interviews

Semi-structured interviews were conducted to gather self-reported barriers and motivators for handwashing and infection, prevention and control practices. Participants’ perceptions of cleanliness and hygiene, sources of information of IPC and handwashing practices and client satisfaction with quality of care were also gathered from this data.

As part of semi-structured interviews, each response had a set of guiding probes to delve deeper into behaviour determinants and challenges faced.

As the data is all self-reported, a series of assumptions about the role of planned, motivated and reactive behaviours in relation to handwashing and IPC behaviours would be made.

### Routine Scripting

Routine Scripting was done with an aim of eliciting the normal, prototypical order of events in the everyday role of selected participants around specific areas/events with emphasis on practices related to the target behaviour. Each specific area of interest had a set of guiding questions to probe into behaviour determinants and barriers.

### Scenarios + Ranking

Using hypothetical scenarios (based on actual events observed during structured observations), this activity was meant to gain insight into the kinds of factors that constrain or promote performance of the target behaviour, while exploring participants’ attitudes or beliefs about particular situations. Using hypothetical scenarios provided an unthreatening and impersonal/indirect avenue for exploring certain topics that were vulnerable to the social desirability bias.

The scenario ranking exercise was aimed at gaining an insight into the relative importance of different hygiene breaches from the perspective of the respondent.
